# Supplementary material for: A New and Fast-Response Fluorescent Probe for Monitoring Hypochlorous Acid Derived from Myeloperoxidase
Source: MDPI journal article supplement (doi:10.3390/molecules28166055), 2023-08-14
Supplement: s1 [file s1]

## Contents:

|                                                                      |    |
|----------------------------------------------------------------------|----|
| 1.1. Synthesis .....                                                 | 1  |
| 1.2. Determination of quantum yield.....                             | 2  |
| 1.3. Determination of detection limit. ....                          | 3  |
| 1.4. Stability in the presence of H <sub>2</sub> S.....              | 4  |
| 1.5. <sup>1</sup> H NMR, <sup>13</sup> C NMR and ESI MS spectra..... | 5  |
| 1.6. Comparison of fluorescent probes based on HOCl response .....   | 11 |
| References.....                                                      | 11 |

### 1.1. Synthesis

To a solution of 7-chloro-4-nitrobenzo-2,1,3-thiadiazole (NBD-S-Cl) (0.5 mmol) in DCM (5 mL), thiomorpholine or its *S*-oxide (0.5 mmol) and Et<sub>3</sub>N (0.6 mmol) were added. The mixture was stirred at a room temperature for 20 h under argon atmosphere. Next, the solvent was evaporated under reduced pressure, and the residue was dissolved in DCM (30 mL). The organic phase was washed with a citric acid solution (20% aq.), distilled water and the saturated NaHCO<sub>3</sub> solution. Finally, the organic phase was dried over anhydrous Na<sub>2</sub>SO<sub>4</sub>, and the solvent was removed in vacuo. The residue was further purified on silica column chromatography using DCM:MeOH (9.5:0.5) as eluent to yield the solid product.

**4-Thiomorpholino-7-nitrobenzothiadiazole** (NBD-S-TM) was obtained in 85% yield as an orange powder. <sup>1</sup>H NMR ( DMSO-d<sub>6</sub>:CDCl<sub>3</sub>, 4:1, 600 MHz) δ (ppm): 8.56 (d, J = 9.0 Hz, 1H), 6.88 (d, J= 9.0 Hz, 1H), 4.42-4.43 (m, 4H), 2.84-2.86 (m, 4H); <sup>13</sup>C NMR (151 MHz): δ (ppm): 149.6; 147.8; 147.4; 132.5; 128.6; 106.6; 52.7; 27.0  
 HRMS (ESI): m/z 283.0330 ([M+H]<sup>+</sup>), Calcd for (M + H)<sup>+</sup> = 283.3420; HRMS (ESI-Na) m/z 305.0150 ([M+Na]<sup>+</sup>), Calcd for (M + Na + H)<sup>+</sup> = 305.3312.

**4-Thiomorpholino-7-nitrobenzenothiadiazole S-oxide** (NBD-S-TSO) was obtained in 50% yield as a dark orange powder. <sup>1</sup>H NMR ( DMSO-d<sub>6</sub>:CDCl<sub>3</sub>, 4:1, 600 MHz) δ (ppm): 8.59 (d, J = 9.0 Hz, 1H), 7.00 (d, J= 9.0 Hz, 1H), 4.81 (d, J = 15 Hz 2H), 4.33 (t, J = 12.6 Hz, 2H), 3.11-3.16 (m, 2H), 2.90-2.92 (m, 2H); <sup>13</sup>C NMR (151 MHz): δ (ppm): 149.5; 147.5; 132.5; 129.1; 128.9; 106.8; 45.3; 41.4  
 HRMS (ESI): m/z 299.0277 ([M+H]<sup>+</sup>), Calcd for (M + H)<sup>+</sup> = 299.3414; HRMS (ESI-Na) m/z 321.0091 ([M+Na]<sup>+</sup>), Calcd for (M + Na + H)<sup>+</sup> = 321.3306.

## 1.2. Determination of quantum yield.

Fluorescence quantum yields were determined by the comparative method using the procedure described previously [S1]. Fluorescence quantum yields were determined using solutions of Quinine sulfate (ΦF = 0.79 in 0.1 M NaOH ) as a standard [S2]. The quantum yield was calculated using the following equation:

$$\Phi^F_x = \Phi^F_s (A_s F_x / A_x F_s) (n_x / n_s)^2$$

- Φ<sup>F</sup> is the fluorescence quantum yield;
- A is the absorbance at the excitation wavelength;
- F is the area under the corrected emission curve;

- $n$  is the refractive index of the solvents used;
- subscripts  $s$  and  $x$  refer to the standard and unknown samples, respectively.

### 1.3. Determination of detection limit.

The limit of detection (LOD) is the lowest signal and was calculated from the titration curve of the NBD-S-T fluorescence in the presence of HOCl and the mean blank. The fluorescence intensity of NBD-S-TM was measured and the standard deviation of the blank measurements was obtained and determined as  $\sigma$  using the following equation:

$$\sigma = \sqrt{\frac{\sum(\bar{x} - X_i)^2}{n - 1}}$$

- $\sigma$  is the standard deviation of the blank;
- $\bar{x}$  is the blank mean;
- $X_i$  is the values of the blank measures;
- $n$  is the blank number tested ( $n = 11$ ).

Detection limit LOD is calculated using the following equation

$$\text{Detection limit} = 3.3\sigma/s$$

- $s$  is the slope of fluorescence intensity versus HOCl concentrations.

#### 1.4. Stability in the presence of H<sub>2</sub>S

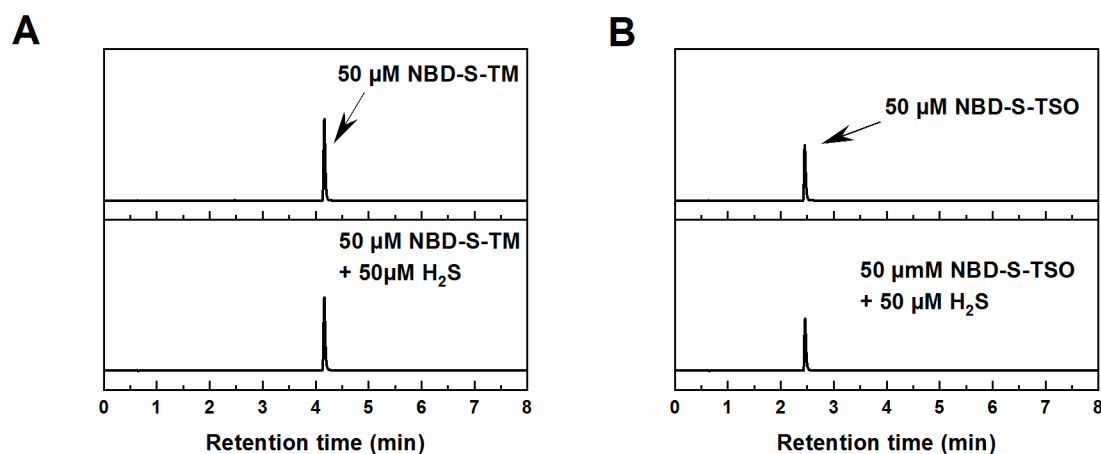

**Figure S1.** (A) The NBD-S-TM probe and (B) NBD-S-TSO standard stability in the presence of H<sub>2</sub>S. All experiments were carried out in an aqueous solution containing phosphate buffer (50 mM, pH 7.4) and MeCN (10%) at room temperature. The traces were collected using an absorption detector set at 500 nm.

# 1.5. $^1\text{H}$ NMR, $^{13}\text{C}$ NMR and ESI MS spectra

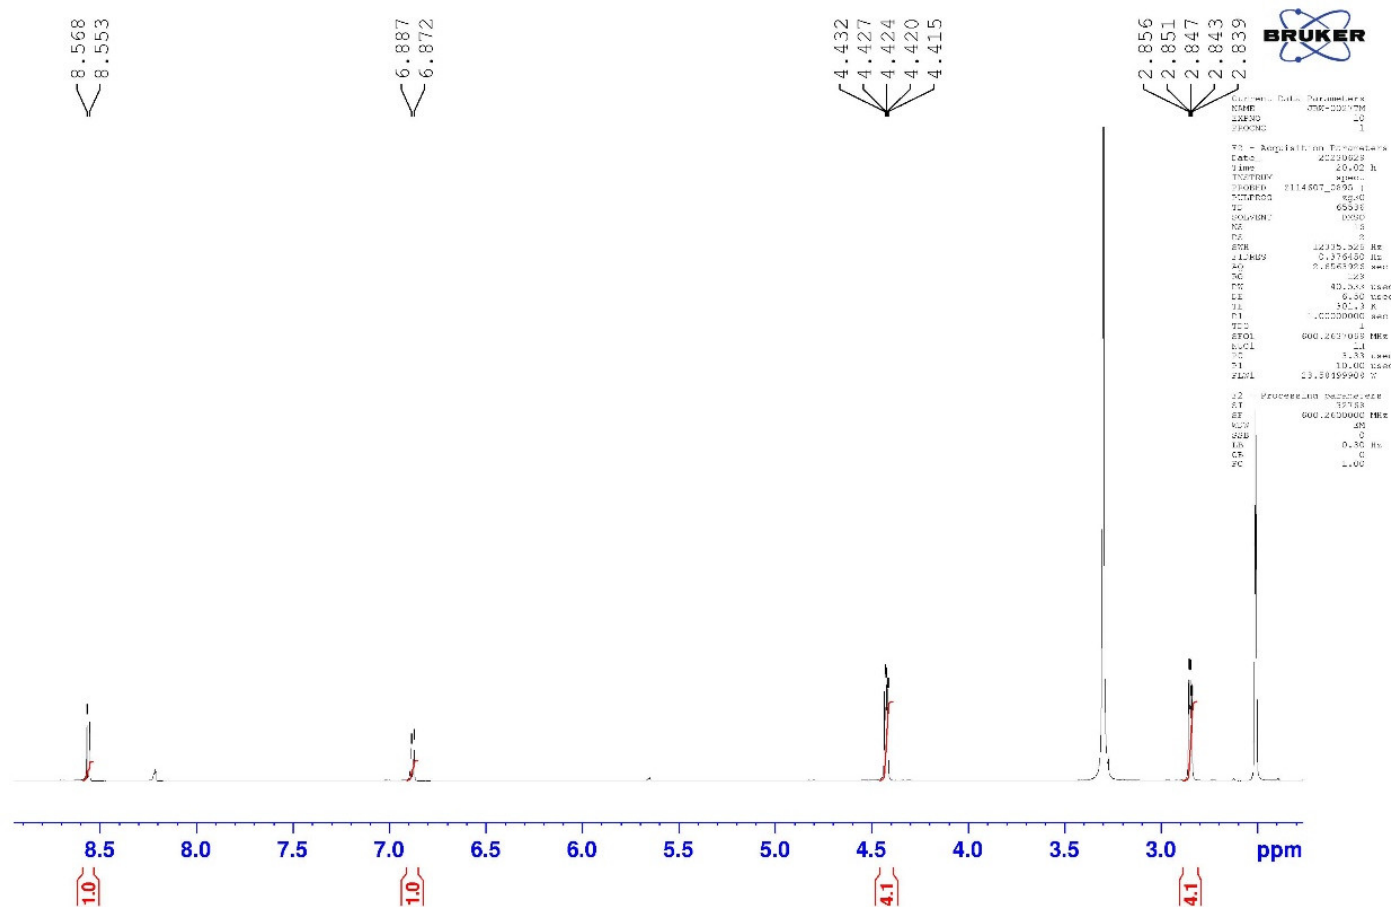

Figure S2.  $^1\text{H}$  NMR spectra of NBD-S-TM.

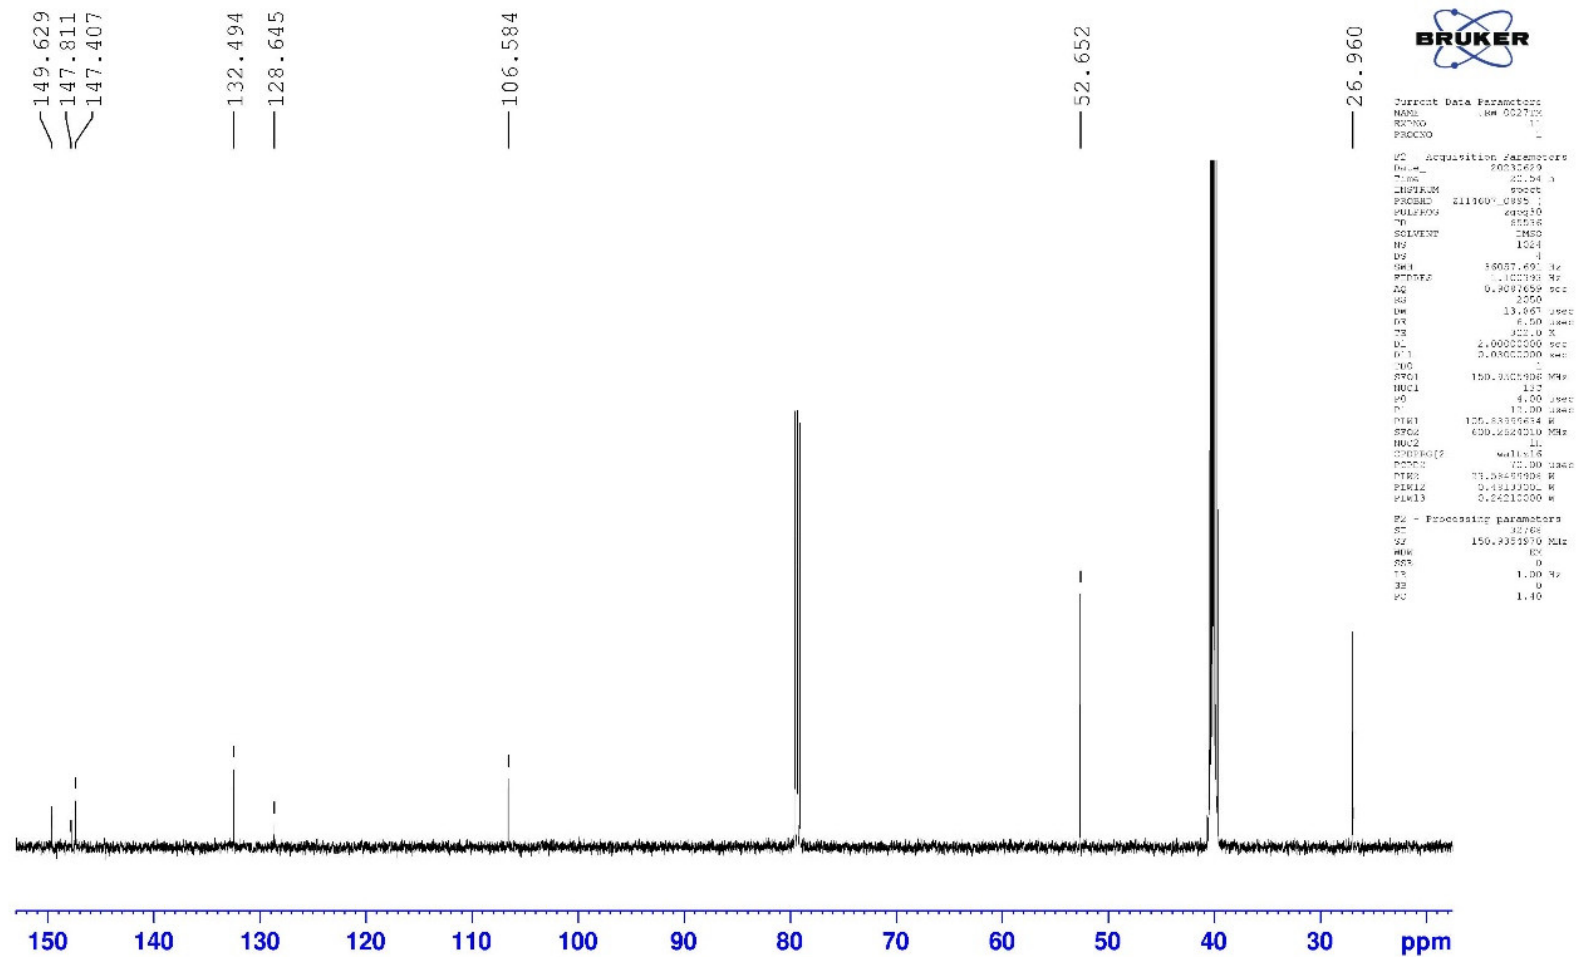

Figure S3.  $^{13}\text{C}$  NMR spectra of NBD-S-TM.

## Elemental Composition Report

### Single Mass Analysis

Tolerance = 5.0 PPM / DBE: min = -1.5, max = 80.0

Element prediction: Off

Number of isotope peaks used for i-FIT = 9

Monoisotopic Mass, Even Electron Ions

75 formula(e) evaluated with 1 results within limits (all results (up to 1000) for each mass)

Elements Used:

C: 0-15 H: 0-30 N: 0-4 O: 0-3 S: 1-2

211217\_NBD\_S\_TM\_posB 17 (0.197) Cm (15:20)

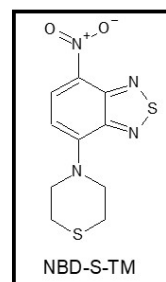

Page 1

TOF MS ES+  
1.40e+006

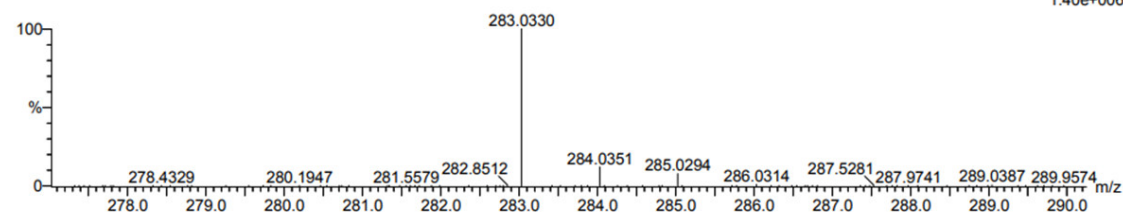

Minimum: -1.5  
Maximum: 5.0 5.0 80.0

| Mass     | Calc. Mass | mDa | PPM | DBE | i-FIT | Norm | Conf(%) | Formula          |
|----------|------------|-----|-----|-----|-------|------|---------|------------------|
| 283.0330 | 283.0323   | 0.7 | 2.5 | 7.5 | 400.1 | n/a  | n/a     | C10 H11 N4 O2 S2 |

211217\_NBD\_S\_TM\_posB 17 (0.197) Cm (15:20)

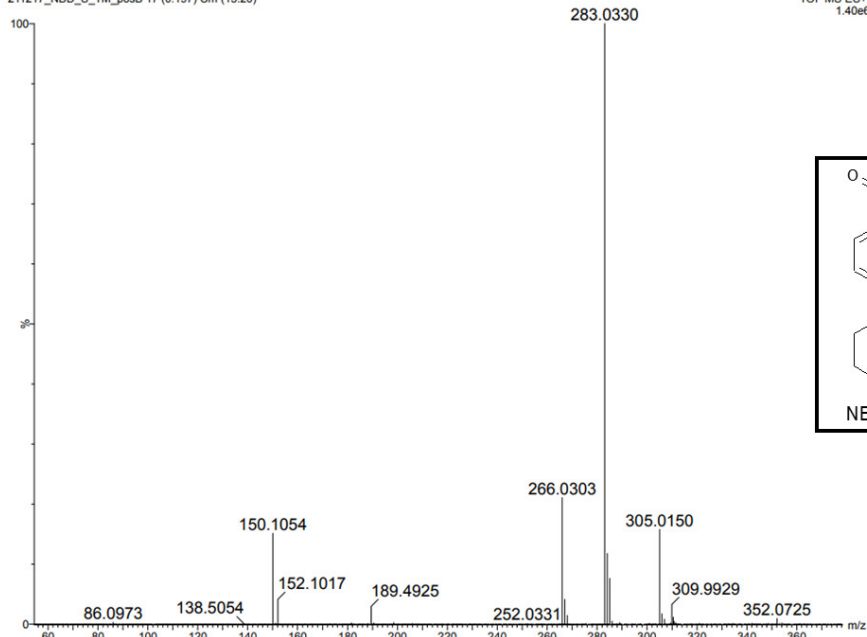

TOF MS ES+  
1.40e6

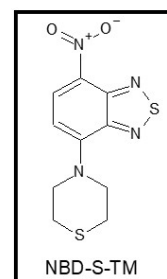

Figure S4. ESI MS spectra of NBD-S-TM.

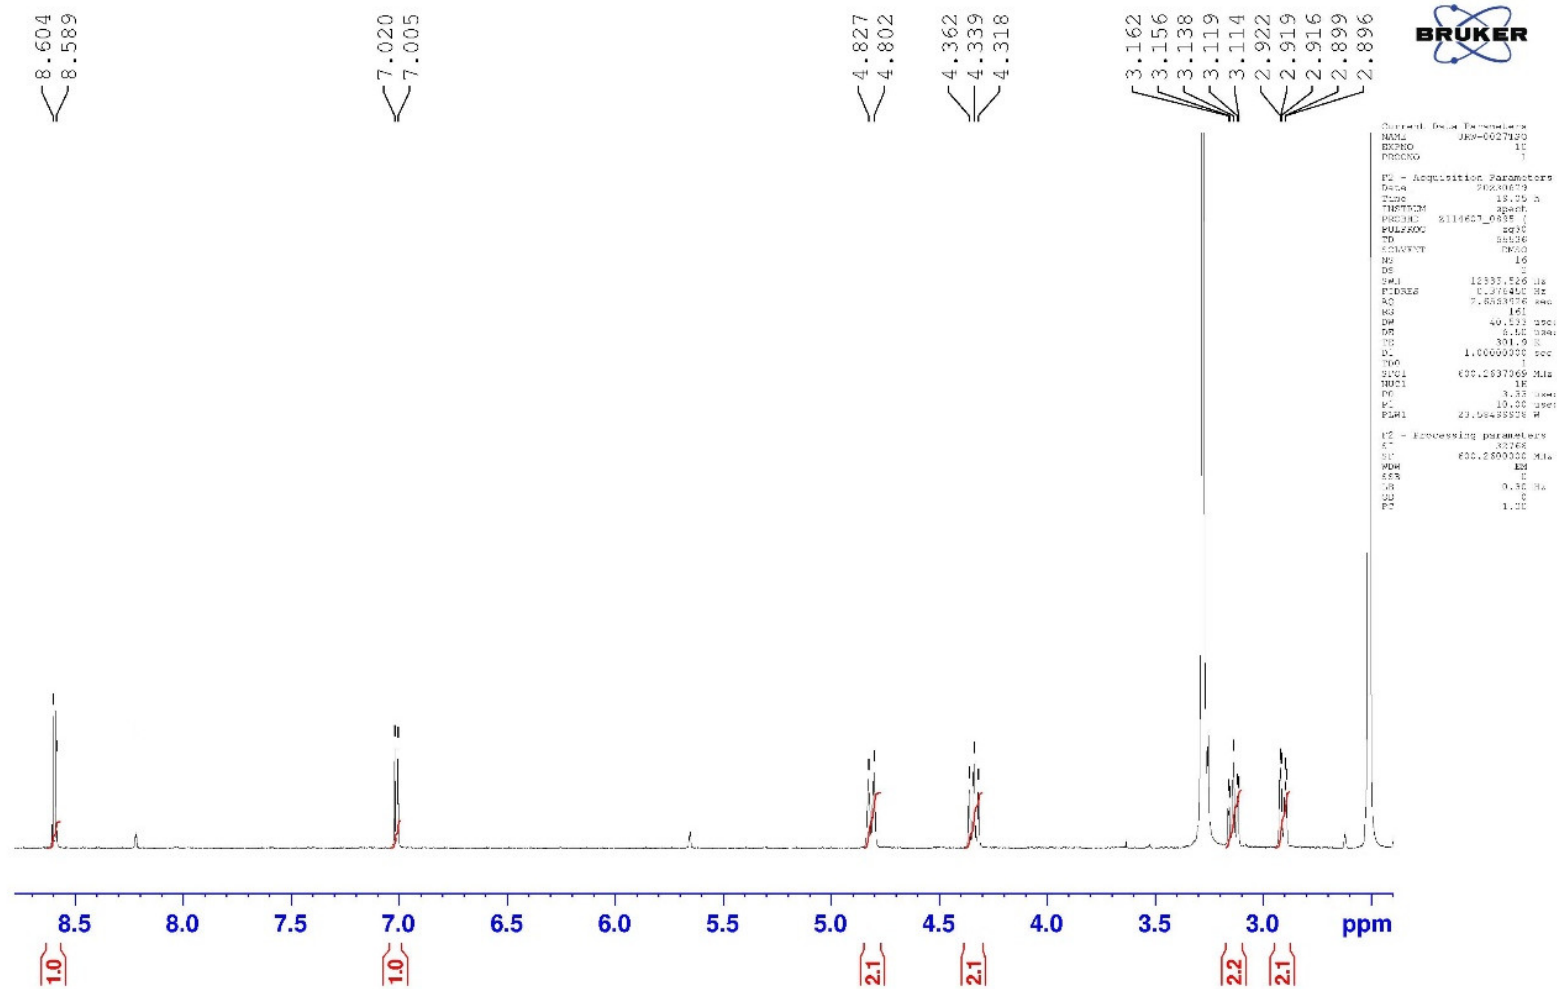

Figure S5. <sup>1</sup>H NMR spectra of NBD-S-TSO.





## Elemental Composition Report

Page 1

### Single Mass Analysis

Tolerance = 5.0 PPM / DBE: min = -1.5, max = 80.0

Element prediction: Off

Number of isotope peaks used for i-FIT = 9

Monoisotopic Mass, Even Electron Ions

61 formula(e) evaluated with 1 results within limits (all results (up to 1000) for each mass)

Elements Used:

C: 0-15 H: 0-30 N: 0-4 O: 0-3 S: 1-2

211217\_NBD\_S\_TSO\_posB 17 (0.197) Cm (15:20-(4:8+47:52))

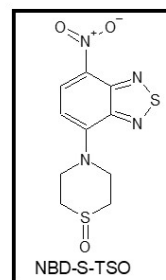

TOF MS ES+  
2.01e+006

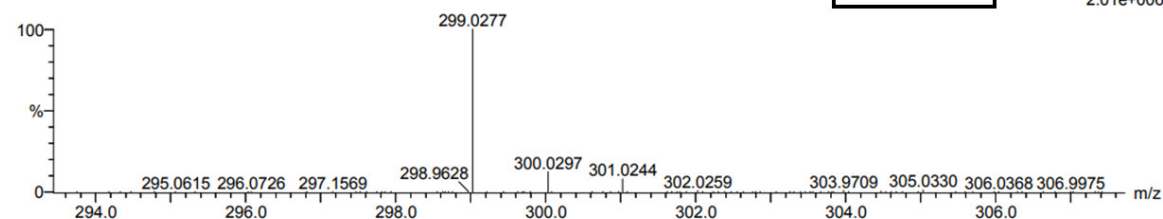

Minimum: -1.5  
Maximum: 5.0 5.0 80.0

| Mass     | Calc. Mass | mDa | PPM | DBE | i-FIT | Norm | Conf(%) | Formula          |
|----------|------------|-----|-----|-----|-------|------|---------|------------------|
| 299.0277 | 299.0273   | 0.4 | 1.3 | 7.5 | 593.4 | n/a  | n/a     | C10 H11 N4 O3 S2 |

211217\_NBD\_S\_TSO\_posB 17 (0.197) Cm (15:20-(4:8+47:52))

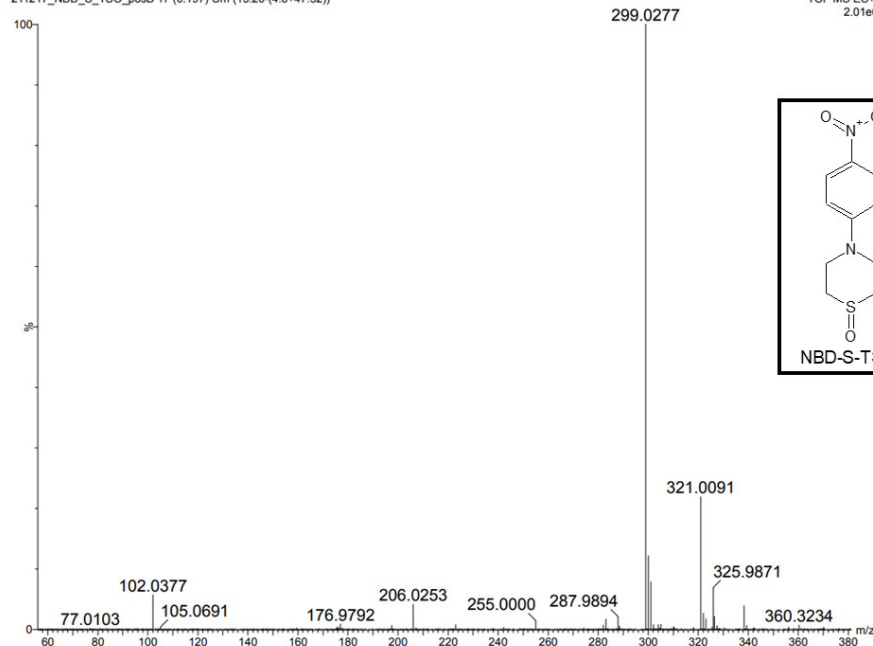

TOF MS ES+  
2.01e6

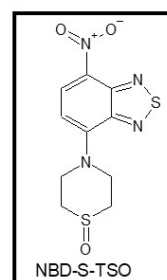

Figure S7. ESI MS spectra of NBD-S-TSO.

## 1.6. Comparison of fluorescent probes based on HOCl response

**Table S1.** Comparison of fluorescent probes based on HOCl response.

| Probe     | LOD     | Response time    | Mechanism | References |
|-----------|---------|------------------|-----------|------------|
| BCy-S     | 35.2 nM | less than 40 s   | TICT      | [3]        |
| Probe 1   | 72 nM   | 30 s             | ICT       | [4]        |
| FNIR-HOCl | 70 nM   | less than 20 s   | -         | [5]        |
| NBD-TM    | 72 nM   | within 1 s       | PET       | [1]        |
| NBD-Se-TM | 258 nM  | within 1 s       | PET       | [6]        |
| HBTN      | 24.5 nM | less than 20 min | -         | [7]        |
| PTA       | 33.9 nM | 45 s             | ICT       | [8]        |
| NBD-S-TM  | 60 nM   | within 1 s       | PET       | This work  |

## References

- S1. Świerczyńska, M.; Słowiński, D.; Grzelakowska, A.; Szala, M.; Romański, J.; Pierzchała, K.; Siarkiewicz, P.; Michalski, R.; Podsiadły, R. Selective, Stoichiometric and Fast-Response Fluorescent Probe Based on 7-Nitrobenz-2-Oxa-1,3-Diazole Fluorophore for Hypochlorous Acid Detection. *Dyes and Pigments* **2021**, *193*, 109563, doi:10.1016/j.dyepig.2021.109563.
- S2. Umberger, J.Q.; LaMer, V.K. The Kinetics of Diffusion Controlled Molecular and Ionic Reactions in Solution as Determined by Measurements of the Quenching of Fluorescence<sup>1,2</sup>. *J. Am. Chem. Soc.* **1945**, *67*, 1099–1109, doi:10.1021/ja01223a023.
- S3. Shao, S.; Yang, T.; Han, Y. A TICT-Based Fluorescent Probe for Hypochlorous Acid and Its Application to Cellular and Zebrafish Imaging. *Sensors and Actuators B: Chemical* **2023**, *392*, 134041, doi:10.1016/j.snb.2023.134041.
- S4. Zheng, Y.; Wu, S.; Bing, Y.; Li, H.; Liu, X.; Li, W.; Zou, X.; Qu, Z. A Simple ICT-Based Fluorescent Probe for HOCl and Bioimaging Applications. *Biosensors* **2023**, *13*, 744, doi:10.3390/bios13070744.
- S5. Jiang, J.; Wang, S.; Wang, S.; Yang, Y.; Zhang, X.; Wang, W.; Zhu, X.; Fang, M.; Xu, Y. In Vivo Bioimaging and Detection of Endogenous Hypochlorous Acid in Lysosome Using a Near-Infrared Fluorescent Probe. *Anal. Methods* **2023**, *15*, 3188–3195, doi:10.1039/D3AY00338H.
- S6. Świerczyńska, M.; Słowiński, D.; Michalski, R.; Romański, J.; Podsiadły, R. A Thiomorpholine-Based Fluorescent Probe for the Far-Red Hypochlorous Acid Monitoring. *Spectrochimica Acta Part A: Molecular and Biomolecular Spectroscopy* **2023**, *289*, 122193, doi:10.1016/j.saa.2022.122193.
- S7. Qu, W.; Yang, B.; Guo, T.; Tian, R.; Qiu, S.; Chen, X.; Geng, Z.; Wang, Z. A Dual-Response Mitochondria-Targeted NIR Fluorescent Probe with Large Stokes Shift for Monitoring Viscosity and HOCl in Living Cells and Zebrafish. *Analyst* **2023**, *148*, 38–46, doi:10.1039/D2AN01693A.
- S8. Shang, Z.; Yang, X.; Meng, Q.; Tian, S.; Zhang, Z. A Ratiometric Near-Infrared Fluorescent Probe for the Detection and Monitoring of Hypochlorous Acid in Rheumatoid Arthritis Model and Real Water Samples. *Smart Molecules* *n/a*, e20220007, doi:10.1002/smo.20220007.
